# Supplementary material for: Nonlinear Quantitative Radiation Sensitivity Prediction Model Based on NCI-60 Cancer Cell Lines
Source: Hindawi journal article supplement (doi:10.1155/2014/903602), 2014-01-01
Supplement: f1 [file 903602.f1.pdf]

# **Non-linear Quantitative Radiation Sensitivity Prediction Model**

## **Based on NCI-60 Cancer Cell Lines**

**Chunying Zhang,<sup>1</sup> Luc Girard,<sup>2,3</sup> Amit Das,<sup>2,4</sup> Sun Chen,<sup>1</sup> Guangqiang Zheng,<sup>1</sup> and Kai Song<sup>1,2,5\*</sup>**

*<sup>1</sup> School of Chemical Engineering and Technology, Tianjin University, 300072 Tianjin, P.R. China*

*<sup>2</sup> Hamon Center for Therapeutic Oncology, University of Texas Southwestern Medical Center, 75390 Dallas, Texas, USA*

*<sup>3</sup> Department of Pharmacology, University of Texas Southwestern Medical Center, Dallas, Texas, USA, 75390*

*<sup>4</sup> Department of Radiation Oncology, University of Texas Southwestern Medical Center, 75390 Dallas, Texas, USA*

*<sup>5</sup> Department of Clinical Sciences, University of Texas Southwestern Medical Center, 75390 Dallas, Texas, USA*

\*Correspondence should be addressed to Kai Song

Email: [ksong@tju.edu.cn](mailto:ksong@tju.edu.cn);

[kai.song@utsouthwestern.edu](mailto:kai.song@utsouthwestern.edu)

Tel: 1-(214)9062552

## **Supplementary material**

## Supplementary methods

### *Significance Analysis of Microarrays (SAM)*

SAM, proposed by Tusher et al. [1], is mainly used to determine whether the changes in gene expression are statistically significant. It identifies significant genes by gene-specific  $t$ -test. SAM calculates a score  $d_j$  for gene  $j$ . In our study,  $d_j$  is used to measure the strength of the relationship between gene expression values and the radiation sensitivity. The  $d_j$  is determined as follows:

$$d_j = \frac{r_j}{s_j + s_0}, \quad j = 1, 2, \dots, n \quad (\text{S1})$$

where  $r_j$  is the linear regression coefficient of gene  $j$ ,  $s_j$  is the standard error of  $r_j$ ,  $s_0$  is an exchangeability factor,  $n$  is the number of genes. The calculations of these parameters are given in [1].

SAM uses False Discovery Rate (FDR) to estimate the number of incorrectly identified significant genes. The FDR formula is:

$$\text{FDR} = \frac{\text{Median (or 90th percentile) of the number of genes falsely called significant}}{\text{Number of genes called significant}} \quad (\text{S2})$$

In the current study, SAM gene selection was conducted using the R package “samr”. The parameter of FDR was set 1%. This corresponded to a gene score threshold of 3.67. Genes with the scores bigger than 3.67 were assumed to significantly related with radiation sensitivity and therefore were selected.

### *Partial Least Squares (PLS)*

PLS algorithm is a useful multivariate statistical analysis tool. It attempts to model relationships between the input variables  $X_{n \times m}$  ( $n$  gene expressions,  $m$  samples) and output variables  $Y_{l \times m}$  (SF2 values). This is achieved by means of extracting a set of orthogonal Latent Variables (LVs), which are linear combinations of the original input variables. The PLS model can be described as follows [2]:

$$X^T = TP^T + E \quad (\text{S3})$$

$$Y^T = UQ^T + F \quad (\text{S4})$$

where  $T_{m \times v}$  and  $U$  are latent variable matrixes extracted from  $X$  and  $Y$ .  $P$  and  $Q$  are loading matrixes,  $E$  and  $F$  are residual matrixes. Therefore, by extracting LVs, the  $n$ -dimensional original input space  $X$  is compressed into the  $v$ -dimensional LV-space. In common cases,  $v \ll n$ , where  $n$  is the number of the original input variables and  $v$  is the number of chosen latent variables. By doing this,

PLS can effectively remove the noise and multi-collinearity of the original data, which is especially true for the gene expression data. In the current study, the derived  $v$  latent variables are used as the new input variables for the SF2 prediction model.

### **Support Vector Machine (SVM)**

SVM is a multivariate machine learning method. In SVM regression, the key idea is to map original data space into higher or infinite dimensionality space  $\mathbf{F}$  by using a nonlinear mapping [3]. This is usually conducted using “kernel function” trick. Then, in  $\mathbf{F}$  space, SVM finds a linear function  $f(x)$  which provides the optimum fit. The final estimated regression line (or hyperplane) is surrounded by an  $\varepsilon$ -insensitive tube with  $\varepsilon$  parameter controlling the precision of regression estimation and serving as regularization constraint to avoid model overfitting. Because of the superior performance of SVM on regression context, it has been widely-applied to the analysis of microarray data.

In this study, SVM regression was implemented using R package “e1071”. The radial basis function (RBF) was used as the kernel function. There were two parameters associated with RBF kernel:  $C$  (penalty factor) and  $\gamma$  (RBF parameter). We utilized grid search and cross validation approach [4] to find the most suitable choices. The process was as follows:

1. Specifying parameter search ranges:  $\gamma = [2^{-10}, 2^3]$ ,  $C = [2^{-10}, 2^7]$  and dividing each of them into 100 intervals;
2. The three-fold cross-validation generalization ability of SVM with parameter pair  $(C_i, \gamma_j)$  ( $i, j = 1, 2, \dots, 100$ ) was evaluated by the following MSE:

$$\text{MSE} = \frac{1}{m_0} \sum_{k=1}^{m_0} (Y_k - \widehat{Y}_k)^2 \quad (\text{S5})$$

where  $Y_k$  is the measured SF2 value of cell line  $k$ ,  $\widehat{Y}_k$  is the corresponding predicted SF2 value with parameter pair  $(C_i, \gamma_j)$  and  $m_0$  is the number of cell lines in the training set;

3. Selecting the pair  $(C_i, \gamma_j)$  with the least MSE as the optimum parameters of final SVM model.

In this study, we obtained a best  $C$  parameter of 91.80, and a best  $\gamma$  parameter of 0.000977.

The final prediction model was developed with the best parameters.

## Supplementary Tables

Supplementary Table S1: Measured and predicted SF2 values of 59 cell lines of NCI-60 platform.<sup>a</sup>

| Cell lines      | Predicted SF2      | Predicted SF2     | Measured SF2 <sup>d</sup> | Error  | Error  |
|-----------------|--------------------|-------------------|---------------------------|--------|--------|
|                 | (SVM) <sup>b</sup> | (LR) <sup>c</sup> |                           | (SVM)  | (LR)   |
| BREAST_BT549    | 0.630              | 0.538             | 0.630                     | 0      | -0.092 |
| BREAST_HS578T   | 0.785              | 0.562             | 0.790                     | -0.005 | -0.228 |
| BREAST_MDAMB231 | 0.625              | 0.515             | 0.630                     | -0.005 | -0.115 |
| BREAST_T47D     | 0.508              | 0.558             | 0.520                     | -0.012 | 0.038  |
| CNS_U251        | 0.566              | 0.561             | 0.570                     | -0.004 | -0.009 |
| COLON_COLO205   | 0.683              | 0.524             | 0.690                     | -0.007 | -0.166 |
| COLON_HCT116    | 0.385              | 0.420             | 0.380                     | 0.005  | 0.040  |
| COLON_HCT15     | 0.396              | 0.382             | 0.400                     | -0.004 | -0.018 |
| COLON_HT29      | 0.784              | 0.513             | 0.790                     | -0.006 | -0.277 |
| MELAN_M14       | 0.415              | 0.620             | 0.420                     | -0.005 | 0.200  |
| MELAN_MALME3M   | 0.802              | 0.620             | 0.800                     | 0.002  | -0.180 |
| MELAN_SKMEL2    | 0.662              | 0.632             | 0.660                     | 0.002  | -0.028 |
| MELAN_SKMEL28   | 0.737              | 0.595             | 0.740                     | -0.003 | -0.145 |
| NSCLC_A549ATCC  | 0.604              | 0.727             | 0.610                     | -0.006 | 0.117  |
| NSCLC_H460      | 0.837              | 0.636             | 0.840                     | -0.003 | -0.204 |
| OVAR_OVCAR3     | 0.542              | 0.514             | 0.550                     | -0.008 | -0.036 |
| OVAR_OVCAR5     | 0.407              | 0.496             | 0.408                     | -0.001 | 0.088  |
| PROSTATE_DU145  | 0.520              | 0.505             | 0.520                     | 0      | -0.015 |
| PROSTATE_PC3    | 0.479              | 0.473             | 0.484                     | -0.005 | -0.011 |
| RENAL_A498      | 0.613              | 0.717             | 0.610                     | 0.003  | 0.107  |
| RENAL_ACHN      | 0.706              | 0.672             | 0.720                     | -0.014 | -0.048 |
| RENAL_CAKI1     | 0.369              | 0.611             | 0.370                     | -0.001 | 0.241  |
| BREAST_MCF7     | 0.576              | 0.441             | 0.576                     | 0      | -0.135 |
| BREAST_MDAMB435 | 0.195              | 0.494             | 0.179                     | 0.015  | 0.314  |
| CNS_SF539       | 0.820              | 0.661             | 0.820                     | 0      | -0.159 |
| COLON_KM12      | 0.423              | 0.457             | 0.420                     | 0.003  | 0.037  |
| COLON_SW620     | 0.620              | 0.458             | 0.620                     | 0      | -0.162 |
| LEUK_CCRFCEM    | 0.199              | -0.072            | 0.185                     | 0.014  | -0.257 |
| LEUK_HL60       | 0.331              | 0.132             | 0.315                     | 0.016  | -0.183 |
| LEUK_MOLT4      | 0.072              | -0.004            | 0.050                     | 0.022  | -0.054 |
| MELAN_LOXIMVI   | 0.679              | 0.633             | 0.680                     | -0.001 | -0.047 |
| MELAN_SKMEL5    | 0.719              | 0.608             | 0.720                     | -0.001 | -0.112 |
| NSCLC_HOP62     | 0.169              | 0.667             | 0.164                     | 0.005  | 0.503  |
| NSCLC_NCIH23    | 0.102              | 0.508             | 0.086                     | 0.016  | 0.422  |
| OVAR_SKOV3      | 0.899              | 0.628             | 0.900                     | -0.001 | -0.272 |
| BREAST_MCF7ADDr | 0.559              | 0.488             | 0.560                     | -0.001 | -0.072 |
| CNS_SF268       | 0.446              | 0.604             | 0.450                     | -0.004 | 0.154  |
| CNS_SF295       | 0.728              | 0.609             | 0.730                     | -0.002 | -0.121 |

Supplementary Table S1: Continued.<sup>a</sup>

| Cell lines     | Predicted SF2      | Predicted SF2     | Measured SF2 <sup>d</sup> | Error  | Error  |
|----------------|--------------------|-------------------|---------------------------|--------|--------|
|                | (SVM) <sup>b</sup> | (LR) <sup>c</sup> |                           | (SVM)  | (LR)   |
| CNS_SNB19      | 0.430              | 0.517             | 0.430                     | 0      | 0.087  |
| CNS_SNB75      | 0.549              | 0.767             | 0.550                     | -0.001 | 0.217  |
| COLON_HCC-2998 | 0.444              | 0.544             | 0.440                     | 0.004  | 0.104  |
| LEUK_K562      | 0.077              | 0.140             | 0.050                     | 0.027  | 0.090  |
| LEUK_RPMI8266  | 0.137              | 0.100             | 0.100                     | 0.037  | 0      |
| LEUK_SR        | 0.118              | 0.437             | 0.070                     | 0.048  | 0.367  |
| MELAN_UACC257  | 0.482              | 0.570             | 0.480                     | 0.002  | 0.090  |
| MELAN_UACC62   | 0.522              | 0.591             | 0.520                     | 0.002  | 0.071  |
| NSCLC_EKVX     | 0.697              | 0.607             | 0.700                     | -0.003 | -0.093 |
| NSCLC_HOP92    | 0.431              | 0.607             | 0.430                     | 0.001  | 0.177  |
| NSCLC_NCIH226M | 0.634              | 0.645             | 0.630                     | 0.004  | 0.015  |
| NSCLC_NCIH332M | 0.651              | 0.560             | 0.650                     | 0.001  | -0.090 |
| NSCLC_NCIHH522 | 0.430              | 0.348             | 0.430                     | 0      | -0.082 |
| OVAR_IGROV1    | 0.393              | 0.403             | 0.390                     | 0.003  | 0.013  |
| OVAR_OVCAR4    | 0.293              | 0.445             | 0.290                     | 0.003  | 0.155  |
| OVAR_OVCAR8    | 0.595              | 0.461             | 0.600                     | -0.005 | -0.139 |
| RENAL_7860     | 0.666              | 0.639             | 0.660                     | 0.006  | -0.021 |
| RENAL_RXF393   | 0.667              | 0.652             | 0.670                     | -0.003 | -0.018 |
| RENAL_SN12C    | 0.620              | 0.595             | 0.620                     | 0      | -0.025 |
| RENAL_TK10     | 0.516              | 0.532             | 0.520                     | -0.004 | 0.012  |
| RENAL_UO31     | 0.615              | 0.657             | 0.620                     | -0.005 | 0.037  |

<sup>a</sup> SF2: survival fraction at 2 Gy  $\gamma$ -ray radiation; LR: linear regression; SVM: support vector machine.

<sup>b</sup> Predicted SF2 values using SVM regression algorithm.

<sup>c</sup> Predicted SF2 values using LR algorithm.

<sup>d</sup> Measured SF2 were obtained from the study of Eschrich et al. [5].

Supplementary Table S2: Statistics of clinical parameters of the cancer patient datasets.<sup>a</sup>

|                  | Glioma dataset |               | Colon cancer dataset |                | Ovarian cancer dataset |                |    |
|------------------|----------------|---------------|----------------------|----------------|------------------------|----------------|----|
|                  | GSE4271[6]     | GSE4412[7]    | GSE17537[8]          | GSE15736[8]    | GSE17260[9]            | GSE9891[10]    |    |
| Total patients   | 77             | 85            | 55                   | 177            | 110                    | 278            |    |
| Age <sup>b</sup> | 45.48 ± 13.02  | 44.38 ± 15.47 | 62.31 ± 14.35        | 65.48 ± 13.08  | NA                     | 59.64 ± 10.58  |    |
| Gender           |                |               |                      |                |                        |                |    |
| Female           | 25             | 53            | 29                   | 81             | NA                     | NA             |    |
| Male             | 52             | 32            | 26                   | 96             | NA                     | NA             |    |
| Stage            |                |               |                      |                |                        |                |    |
| III              | 21             | 26            | I                    | 4              | 24                     | I              | 24 |
| IV               | 56             | 59            | II                   | 15             | 57                     | II             | 17 |
|                  |                |               | III                  | 19             | 57                     | III            | 93 |
|                  |                |               | IV                   | 17             | 39                     | IV             | 17 |
|                  |                |               |                      |                |                        | Unknown        | 1  |
| Median OS        | 23.75          | 12.97         | 50.20                | 42.27          | 17.00                  | 28.50          |    |
| Platform         | Affymetrix     | Affymetrix    | Affymetrix           | Affymetrix     | Aglient                | Affymetrix     |    |
|                  | HG-U133A       | HG-U133A      | HG-U133 plus_2       | HG-U133 plus_2 | 4×44K                  | HG-U133 plus_2 |    |

<sup>a</sup>NA: not available; OS: overall survival (months).

All cancer patient datasets can be downloaded from Gene Expression Omnibus (GEO).

<sup>b</sup>Age: mean ± standard deviation of patients' ages in the same dataset.

Supplementary Table S3: List of the 129 genes selected by SAM analysis.

| Gene symbol      |                |                  |                  |                |                  |               |
|------------------|----------------|------------------|------------------|----------------|------------------|---------------|
| <i>ITGB5</i>     | <i>SI00A16</i> | <i>CTBP2</i>     | <i>YAP1</i>      | <i>NQO1</i>    | <i>CD53</i>      | <i>IL2RG</i>  |
| <i>PLK2</i>      | <i>PTGR1</i>   | <i>MYO1B</i>     | <i>LAMB1</i>     | <i>P4HA2</i>   | <i>PTPRC</i>     | <i>DCP2</i>   |
| <i>PARVA</i>     | <i>SH3BP4</i>  | <i>ACTN1</i>     | <i>TNFRSF12A</i> | <i>TTYH3</i>   | <i>IKZF1</i>     | <i>RCSL1</i>  |
| <i>BCAR3</i>     | <i>MYO1E</i>   | <i>ANXA2</i>     | <i>EPHA2</i>     | <i>PRSS23</i>  | <i>NSUN6</i>     | <i>PRKCQ</i>  |
| <i>TUSC1</i>     | <i>MYOF</i>    | <i>HTRA1</i>     | <i>LMNA</i>      | <i>GAS2L3</i>  | <i>GMFG</i>      | <i>SLA</i>    |
| <i>GNG12</i>     | <i>ZFH3</i>    | <i>TGFBI</i>     | <i>GNA11</i>     | <i>LRP11</i>   | <i>SLAMF6</i>    | <i>ICAM3</i>  |
| <i>PLS3</i>      | <i>TSPAN6</i>  | <i>UEVLD</i>     | <i>WWTR1</i>     | <i>NUAK1</i>   | <i>WAS</i>       | <i>CD69</i>   |
| <i>CUEDC1</i>    | <i>FAM129B</i> | <i>LHFPL2</i>    | <i>KIAA1522</i>  | <i>LIF</i>     | <i>PSMD5-AS1</i> | <i>BCOR</i>   |
| <i>C15orf52</i>  | <i>SRGAP1</i>  | <i>SI00A13</i>   | <i>SERPIN6</i>   | <i>HMOX1</i>   | <i>IL23A</i>     | <i>IQGAP2</i> |
| <i>PTPN14</i>    | <i>ST5</i>     | <i>PLEKHA1</i>   | <i>IGFBP3</i>    | <i>ZNF532</i>  | <i>LSP1</i>      |               |
| <i>CKAP4</i>     | <i>SCML1</i>   | <i>RAI14</i>     | <i>EMP2</i>      | <i>CTSD</i>    | <i>GRIK5</i>     |               |
| <i>CTGF</i>      | <i>NR2F2</i>   | <i>SYTL2</i>     | <i>NCKAP1</i>    | <i>VEGFC</i>   | <i>MYO1G</i>     |               |
| <i>EPS8</i>      | <i>RIN2</i>    | <i>SH3D19</i>    | <i>PFN2</i>      | <i>SNX7</i>    | <i>LOC285957</i> |               |
| <i>NEK6</i>      | <i>PPP2R3A</i> | <i>TWF1</i>      | <i>CD44</i>      | <i>PTK2</i>    | <i>TRIM73</i>    |               |
| <i>ZNF703</i>    | <i>TJP1</i>    | <i>ARMC9</i>     | <i>RND3</i>      | <i>THAP10</i>  | <i>RHOH</i>      |               |
| <i>TM4SF1</i>    | <i>ATP1B1</i>  | <i>CD151</i>     | <i>SEPT10</i>    | <i>BEAN</i>    | <i>ARHGAP9</i>   |               |
| <i>AGAP2-AS1</i> | <i>ANKRD57</i> | <i>DIP2C</i>     | <i>LMCD1</i>     | <i>ANXA2P2</i> | <i>GIMAP6</i>    |               |
| <i>AHNAK2</i>    | <i>MYO10</i>   | <i>BACE1</i>     | <i>FAM114A1</i>  | <i>LAMB2</i>   | <i>CD3D</i>      |               |
| <i>CBR1</i>      | <i>GPX8</i>    | <i>RBPMS</i>     | <i>PHLDA3</i>    | <i>LRMP</i>    | <i>ACVR2B</i>    |               |
| <i>RASAL2</i>    | <i>IL17RC</i>  | <i>LINC01137</i> | <i>DSTN</i>      | <i>CORO1A</i>  | <i>RNASE6</i>    |               |

Supplementary Table S4: 129 radiation sensitivity signature genes enriched gene ontology terms.

| GO ID                                      | Term                                                | Count <sup>a</sup> | <i>P</i> value <sup>b</sup> |
|--------------------------------------------|-----------------------------------------------------|--------------------|-----------------------------|
| <b>Biological process (GO_TERM_BP_FAT)</b> |                                                     |                    |                             |
| GO:0030029                                 | actin filament-based process                        | 10                 | 3.42578E-05                 |
| GO:0001568                                 | blood vessel development                            | 10                 | 3.89642E-05                 |
| GO:0001944                                 | vasculature development                             | 10                 | 4.70455E-05                 |
| GO:0031589                                 | cell-substrate adhesion                             | 7                  | 5.02553E-05                 |
| GO:0048514                                 | blood vessel morphogenesis                          | 9                  | 8.59551E-05                 |
| GO:0030036                                 | actin cytoskeleton organization                     | 9                  | 1.38430E-04                 |
| GO:0045597                                 | positive regulation of cell differentiation         | 9                  | 1.51585E-04                 |
| GO:0001525                                 | angiogenesis                                        | 7                  | 4.80887E-04                 |
| GO:0051094                                 | positive regulation of developmental process        | 9                  | 5.59491E-04                 |
| GO:0007155                                 | cell adhesion                                       | 14                 | 7.82905E-04                 |
| GO:0022610                                 | biological adhesion                                 | 14                 | 7.93329E-04                 |
| GO:0007015                                 | actin filament organization                         | 5                  | 1.39055E-03                 |
| GO:0010627                                 | regulation of protein kinase cascade                | 8                  | 1.43169E-03                 |
| GO:0042110                                 | T cell activation                                   | 6                  | 1.58861E-03                 |
| GO:0050870                                 | positive regulation of T cell activation            | 5                  | 1.69910E-03                 |
| GO:0007167                                 | enzyme linked receptor protein signaling pathway    | 9                  | 2.11143E-03                 |
| GO:0007010                                 | cytoskeleton organization                           | 10                 | 2.61752E-03                 |
| GO:0007169                                 | transmembrane receptor protein tyrosine kinase      | 7                  | 3.98923E-03                 |
| GO:0051251                                 | positive regulation of lymphocyte activation        | 5                  | 4.12354E-03                 |
| GO:0002694                                 | regulation of leukocyte activation                  | 6                  | 5.21474E-03                 |
| GO:0010740                                 | positive regulation of protein kinase cascade       | 6                  | 5.34769E-03                 |
| GO:0002696                                 | positive regulation of leukocyte activation         | 5                  | 5.64814E-03                 |
| GO:0043122                                 | regulation of I-kappaB kinase/NF-kappaB cascade     | 5                  | 5.83781E-03                 |
| GO:0050865                                 | regulation of cell activation                       | 6                  | 6.49905E-03                 |
| GO:0050867                                 | positive regulation of cell activation              | 5                  | 6.63896E-03                 |
| GO:0050863                                 | regulation of T cell activation                     | 5                  | 7.97237E-03                 |
| GO:0040008                                 | regulation of growth                                | 8                  | 8.06074E-03                 |
| GO:0030217                                 | T cell differentiation                              | 4                  | 9.52246E-03                 |
| GO:0051270                                 | regulation of cell motion                           | 6                  | 9.70659E-03                 |
| GO:0001558                                 | regulation of cell growth                           | 6                  | 9.91166E-03                 |
| GO:0016477                                 | cell migration                                      | 7                  | 1.07257E-02                 |
| GO:0046649                                 | lymphocyte activation                               | 6                  | 1.09819E-02                 |
| GO:0046635                                 | positive regulation of alpha-beta T cell activation | 3                  | 1.30971E-02                 |
| GO:0006468                                 | protein amino acid phosphorylation                  | 11                 | 1.39675E-02                 |
| GO:0009967                                 | positive regulation of signal transduction          | 7                  | 1.45126E-02                 |
| GO:0006928                                 | cell motion                                         | 9                  | 1.45393E-02                 |
| GO:0048870                                 | cell motility                                       | 7                  | 1.73364E-02                 |
| GO:0051674                                 | localization of cell                                | 7                  | 1.73364E-02                 |



Supplementary Table S4: Continued.

| GO ID                                      | Term                                                 | Count <sup>a</sup> | P value <sup>b</sup> |
|--------------------------------------------|------------------------------------------------------|--------------------|----------------------|
| GO:0051249                                 | regulation of lymphocyte activation                  | 5                  | 1.76492E-02          |
| GO:0060021                                 | palate development                                   | 3                  | 1.94746E-02          |
| GO:0045582                                 | positive regulation of T cell differentiation        | 3                  | 1.94746E-02          |
| GO:0001501                                 | skeletal system development                          | 7                  | 2.05192E-02          |
| GO:0032956                                 | regulation of actin cytoskeleton organization        | 4                  | 2.20693E-02          |
| GO:0007160                                 | cell-matrix adhesion                                 | 4                  | 2.20693E-02          |
| GO:0045621                                 | positive regulation of lymphocyte differentiation    | 3                  | 2.30604E-02          |
| GO:0010647                                 | positive regulation of cell communication            | 7                  | 2.34591E-02          |
| GO:0045321                                 | leukocyte activation                                 | 6                  | 2.35833E-02          |
| GO:0032970                                 | regulation of actin filament-based process           | 4                  | 2.40577E-02          |
| GO:0046634                                 | regulation of alpha-beta T cell activation           | 3                  | 2.43116E-02          |
| GO:0001822                                 | kidney development                                   | 4                  | 2.68552E-02          |
| GO:0030334                                 | regulation of cell migration                         | 5                  | 2.71445E-02          |
| GO:0043123                                 | positive regulation of I-kappaB kinase/NF-kappaB     | 4                  | 2.75807E-02          |
| GO:0042102                                 | positive regulation of T cell proliferation          | 3                  | 2.82270E-02          |
| GO:0006796                                 | phosphate metabolic process                          | 13                 | 2.94469E-02          |
| GO:0006793                                 | phosphorus metabolic process                         | 13                 | 2.94469E-02          |
| GO:0030098                                 | lymphocyte differentiation                           | 4                  | 3.21520E-02          |
| GO:0045892                                 | negative regulation of transcription, DNA-dependent  | 7                  | 3.27813E-02          |
| GO:0030198                                 | extracellular matrix organization                    | 4                  | 3.29501E-02          |
| GO:0045663                                 | positive regulation of myoblast differentiation      | 2                  | 3.31893E-02          |
| GO:0002246                                 | healing during inflammatory response                 | 2                  | 3.31893E-02          |
| GO:0000122                                 | negative regulation of transcription from RNA        | 6                  | 3.35584E-02          |
| GO:0051253                                 | negative regulation of RNA metabolic process         | 7                  | 3.51392E-02          |
| GO:0001655                                 | urogenital system development                        | 4                  | 3.79548E-02          |
| GO:0040012                                 | regulation of locomotion                             | 5                  | 4.04879E-02          |
| GO:0010564                                 | regulation of cell cycle process                     | 4                  | 4.14951E-02          |
| GO:0016310                                 | phosphorylation                                      | 11                 | 4.20875E-02          |
| GO:0001775                                 | cell activation                                      | 6                  | 4.41696E-02          |
| GO:0045580                                 | regulation of T cell differentiation                 | 3                  | 4.61255E-02          |
| GO:0045059                                 | positive thymic T cell selection                     | 2                  | 4.61579E-02          |
| GO:0031952                                 | regulation of protein amino acid autophosphorylation | 2                  | 4.61579E-02          |
| GO:0060284                                 | regulation of cell development                       | 5                  | 4.94222E-02          |
| <b>Cellular component (GO_TERM_CC_FAT)</b> |                                                      |                    |                      |
| GO:0015629                                 | actin cytoskeleton                                   | 12                 | 1.57212E-06          |
| GO:0005886                                 | plasma membrane                                      | 44                 | 3.58010E-05          |
| GO:0044459                                 | plasma membrane part                                 | 30                 | 1.22653E-04          |
| GO:0005856                                 | cytoskeleton                                         | 21                 | 5.85483E-04          |
| GO:0016459                                 | myosin complex                                       | 5                  | 9.05618E-04          |
| GO:0016323                                 | basolateral plasma membrane                          | 7                  | 2.30153E-03          |

Supplementary Table S4: Continued.

| GO ID                                      | Term                                          | Count <sup>a</sup> | P value <sup>b</sup> |
|--------------------------------------------|-----------------------------------------------|--------------------|----------------------|
| GO:0005912                                 | adherens junction                             | 6                  | 3.69984E-03          |
| GO:0005925                                 | focal adhesion                                | 5                  | 4.72074E-03          |
| GO:0005924                                 | cell-substrate adherens junction              | 5                  | 5.40917E-03          |
| GO:0070161                                 | anchoring junction                            | 6                  | 5.74083E-03          |
| GO:0030055                                 | cell-substrate junction                       | 5                  | 6.56301E-03          |
| GO:0009986                                 | cell surface                                  | 8                  | 8.37752E-03          |
| GO:0031982                                 | vesicle                                       | 11                 | 1.31904E-02          |
| GO:0005604                                 | basement membrane                             | 4                  | 1.50929E-02          |
| GO:0009898                                 | internal side of plasma membrane              | 7                  | 1.86281E-02          |
| GO:0048770                                 | pigment granule                               | 4                  | 2.13910E-02          |
| GO:0042470                                 | melanosome                                    | 4                  | 2.13910E-02          |
| GO:0044421                                 | extracellular region part                     | 13                 | 2.45258E-02          |
| GO:0031410                                 | cytoplasmic vesicle                           | 10                 | 2.64629E-02          |
| GO:0031012                                 | extracellular matrix                          | 7                  | 2.72444E-02          |
| GO:0043232                                 | intracellular non-membrane-bounded organelle  | 26                 | 2.89259E-02          |
| GO:0043228                                 | non-membrane-bounded organelle                | 26                 | 2.89259E-02          |
| GO:0031988                                 | membrane-bounded vesicle                      | 9                  | 3.48494E-02          |
| GO:0044420                                 | extracellular matrix part                     | 4                  | 4.29702E-02          |
| GO:0005887                                 | integral to plasma membrane                   | 14                 | 4.95581E-02          |
| <b>Molecular function (GO_TERM_MF_FAT)</b> |                                               |                    |                      |
| GO:0005546                                 | phosphatidylinositol-4,5-bisphosphate binding | 5                  | 5.01356E-07          |
| GO:0003779                                 | actin binding                                 | 14                 | 5.29497E-07          |
| GO:0008092                                 | cytoskeletal protein binding                  | 16                 | 2.66515E-06          |
| GO:0030695                                 | GTPase regulator activity                     | 11                 | 6.15459E-04          |
| GO:0060589                                 | nucleoside-triphosphatase regulator activity  | 11                 | 7.29567E-04          |
| GO:0035091                                 | phosphoinositide binding                      | 6                  | 7.45552E-04          |
| GO:0005543                                 | phospholipid binding                          | 7                  | 1.68771E-03          |
| GO:0019838                                 | growth factor binding                         | 5                  | 6.80077E-03          |
| GO:0005178                                 | integrin binding                              | 4                  | 8.66008E-03          |
| GO:0019899                                 | enzyme binding                                | 10                 | 1.24934E-02          |
| GO:0032403                                 | protein complex binding                       | 6                  | 1.32782E-02          |
| GO:0005520                                 | insulin-like growth factor binding            | 3                  | 1.36823E-02          |
| GO:0005083                                 | small GTPase regulator activity               | 7                  | 1.38146E-02          |
| GO:0003774                                 | motor activity                                | 5                  | 1.89288E-02          |
| GO:0017137                                 | RabGTPase binding                             | 3                  | 1.93862E-02          |
| GO:0003714                                 | transcription corepressor activity            | 5                  | 2.02699E-02          |
| GO:0016564                                 | transcription repressor activity              | 7                  | 2.58504E-02          |
| GO:0017016                                 | RasGTPase binding                             | 4                  | 2.74895E-02          |
| GO:0008047                                 | enzyme activator activity                     | 7                  | 3.30755E-02          |
| GO:0031267                                 | small GTPase binding                          | 4                  | 3.58474E-02          |

Supplementary Table S4: Continued.

| GO ID      | Term                        | Count <sup>a</sup> | <i>P</i> value <sup>b</sup> |
|------------|-----------------------------|--------------------|-----------------------------|
| GO:0070064 | proline-rich region binding | 2                  | 4.22249E-02                 |
| GO:0008289 | lipid binding               | 8                  | 4.24390E-02                 |
| GO:0051020 | GTPase binding              | 4                  | 4.33707E-02                 |
| GO:0004857 | enzyme inhibitor activity   | 6                  | 4.44564E-02                 |

<sup>a</sup>Number of the radiation sensitivity signature genes included in each term.

<sup>b</sup>*P* value was derived from a modified Fisher's exact test. The smaller the *P* value was, the more significant the term was enriched.

Supplementary Table S5: 129 radiation sensitivity signature genes enriched KEGG pathways.

| KEGG ID  | Pathway name                           | <i>P</i> value <sup>a</sup> | Gene symbol <sup>b</sup>                                    |
|----------|----------------------------------------|-----------------------------|-------------------------------------------------------------|
| hsa04810 | Regulation of actin cytoskeleton       | 9.01774E-04                 | <i>PFN2, PTK2, IQGAP2, ITGB5, ACTN1, GNG12, WAS, NCKAPI</i> |
| hsa04510 | Focal adhesion                         | 3.39084E-03                 | <i>VEGFC, PTK2, LAMB2, ITGB5, ACTN1, LAMB1, PARVA</i>       |
| hsa04512 | ECM-receptor interaction               | 2.42113E-02                 | <i>LAMB2, CD44, ITGB5, LAMB1</i>                            |
| hsa05340 | Primary immunodeficiency               | 2.77123E-02                 | <i>PTPRC, CD3D, IL2RG</i>                                   |
| hsa04060 | Cytokine-cytokine receptor interaction | 4.36412E-02                 | <i>LIF, VEGFC, ACVR2B, IL23A, TNFRSF12A, IL2RG</i>          |

<sup>a</sup> *P* value was calculated in exactly the same way as GO analysis in Table S4.

<sup>b</sup> Radiation sensitivity signature genes included in each term.

## Supplementary Figures

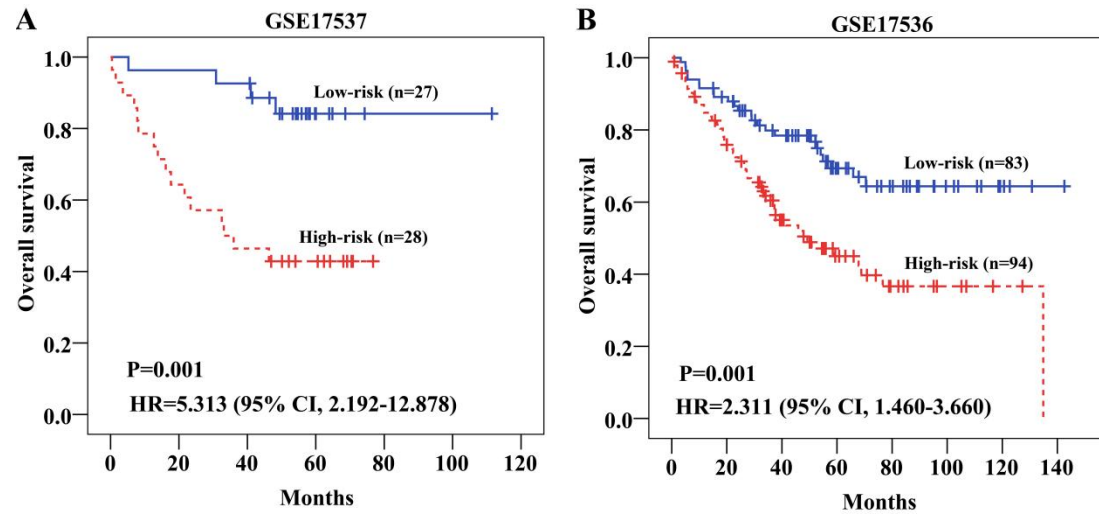

Supplementary Figure S1: Survival curves of the patients in colon cancer cohort.

HR: hazard ratio; CI: confidence interval.

The Cox regression model was trained with the 16 genes refined from the GSE17537 training dataset. The median of the estimated risk scores was used as the cutoff to divide the patients into high-risk and low-risk groups.  $P$  values were obtained from the log-rank test.

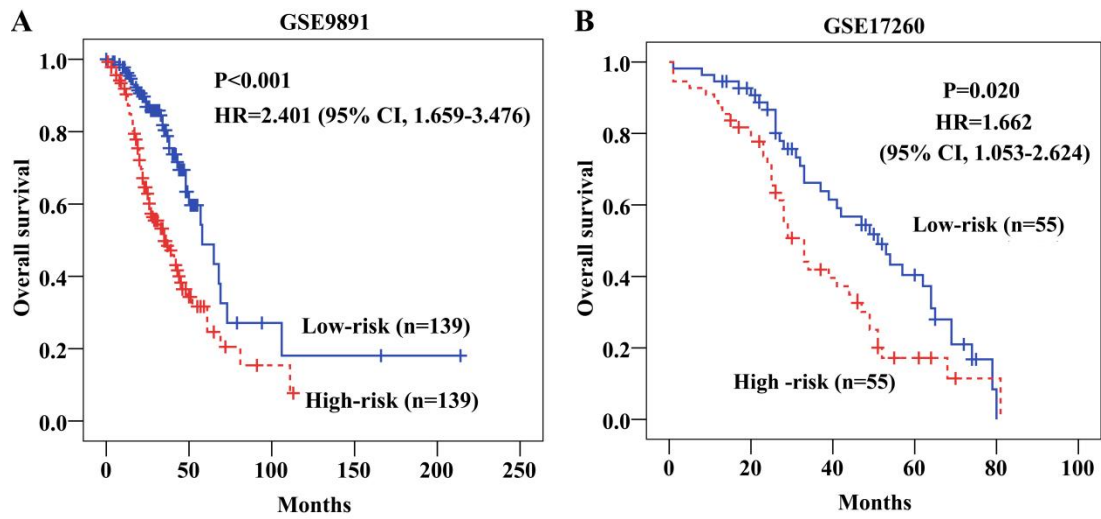

Supplementary Figure S2: Survival curves of the patients in ovarian cancer cohort.

HR: hazard ratio; CI: confidence interval

The Cox regression model was trained with the 18 genes refined from the GSE9891 training dataset. The median of the estimated risk scores was used as the cutoff to divide the patients into high-risk and low-risk groups. *P* values were obtained from the log-rank test.

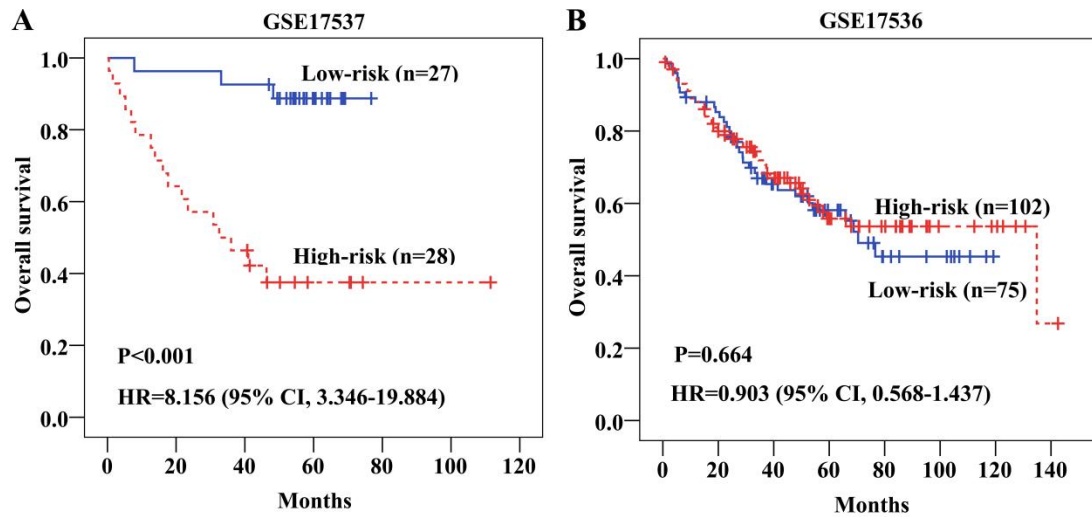

Supplementary Figure S3: Survival analysis of colon cancer cohort using ten hub genes reported by Eschrich et al.

HR: hazard ratio; CI: confidence interval.

The Cox regression model was trained on the GSE17537 training dataset. The median of the estimated risk scores was used as the cutoff to divide the patients into high-risk and low-risk groups.  $P$  values were obtained from the log-rank test.

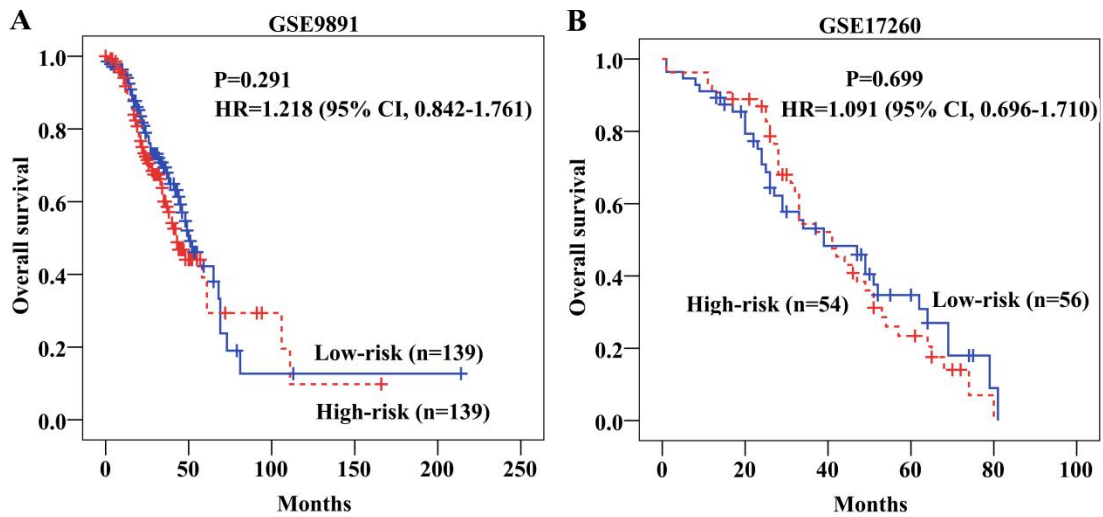

Supplementary Figure S4: Survival analysis of ovarian cancer cohort using ten hub genes reported by Eschrich et al.

HR: hazard ratio; CI: confidence interval.

The Cox regression model was trained on the GSE9891 training set. The median of the estimated risk scores was used as the cutoff to divide the patients into high-risk and low-risk groups. *P* values were obtained from the log-rank test.



## Reference

- [1] V. G. Tusher, R. Tibshirani, and G. Chu, "Significance analysis of microarrays applied to the ionizing radiation response," *Proceedings of the National Academy of Sciences of the United States of America*, vol. 98, no. 18, pp. 5116–5121, 2001.
- [2] A.-L. Boulesteix and K. Strimmer, "Partial least squares: a versatile tool for the analysis of high-dimensional genomic data," *Briefings in Bioinformatics*, vol. 8, no. 1, pp. 32–44, 2007.
- [3] A. J. Smola and B. Scholkopf, "A tutorial on support vector regression," *Statistics and Computing*, vol. 14, no. 3, pp. 199–222, 2004.
- [4] A. Ben-Hur and J. Weston, "A user's guide to support vector machines," *Methods in Molecular Biology (Clifton, N.J.)*, vol. 609, pp. 223–239, 2010.
- [5] S. Eschrich, H. L. Zhang, H. Y. Zhao, et al., "Systems biology modeling of the radiation sensitivity network: a biomarker discovery platform," *International Journal of Radiation Oncology\* Biology\* Physics*, vol. 75, no. 2, pp. 497–505, 2009.
- [6] H. S. Phillips, S. Kharbanda, R. Chen, et al., "Molecular subclasses of high-grade glioma predict prognosis, delineate a pattern of disease progression, and resemble stages in neurogenesis," *Cancer Cell*, vol. 9, no. 3, pp. 157–173, 2006.
- [7] W. A. Freije, F. E. Castro-Vargas, Z. Fang, et al., "Gene expression profiling of gliomas strongly predicts survival," *Cancer Research*, vol. 64, no. 18, pp. 6503–6510, 2004.
- [8] J. J. Smith, N. G. Deane, F. Wu, et al., "Experimentally derived metastasis gene expression profile predicts recurrence and death in patients with colon cancer," *Gastroenterology*, vol. 138, no. 3, pp. 958–968, 2010.
- [9] K. Yoshihara, A. Tajima, T. Yahata, et al., "Gene expression profile for predicting survival in advanced-stage serous ovarian cancer across two independent datasets," *PLoS One*, vol. 5, no. 3, 2010.
- [10] R. W. Tothill, A. V. Tinker, J. George, et al., "Novel molecular subtypes of serous and endometrioid ovarian cancer linked to clinical outcome," *Clinical Cancer Research*, vol. 14, no. 16, pp. 5198–5208, 2008.
